# Supplementary material
Source: MDPI journal article supplement (https://www.mdpi.com/2073-4344/12/8/903)
Supplement: s1 [file s1]

# Revealing the synergetic effects between reactants in oxidative coupling of methane on stepped MgO(100) catalyst

XiaoYing Sun<sup>1</sup>, XinYu Li<sup>1</sup>, Bo Li<sup>1</sup> and Zhen Zhao<sup>1,2\*</sup>

<sup>1</sup>Institute of Catalysis for Energy and Environment, College of Chemistry and Chemical Engineering, Shenyang Normal University, Shenyang 110034, China

<sup>2</sup>State Key Laboratory of Heavy Oil Processing, China University of Petroleum, Beijing 102249, China

<sup>3</sup>Shenyang National Laboratory for Materials Science, Institute of Metal Research, Chinese Academy of Sciences, Shenyang 110016, Liaoning, China

\*E-mail: zhaozhen1586@163.com, zhenzhao@cup.edu.cn, zhaozhen@synu.edu.cn

Table S1 The optimized bond distance and adsorption energies of CH<sub>4</sub> and O<sub>2</sub> molecular adsorbed on the Stepped MgO(100).

|                         | O <sub>2</sub> * | CH <sub>4</sub> * | CH <sub>4</sub> * + O <sub>2</sub> * |
|-------------------------|------------------|-------------------|--------------------------------------|
| E/eV                    | -0.25            | -0.25             | -0.38                                |
| R(C-H)/Å                |                  | 1.10              | 1.10                                 |
| R(O <sub>s</sub> -H)/Å  |                  | 2.50              | 2.30                                 |
| R(C-Mg)/Å               |                  | 2.86              |                                      |
| R(O-O)/Å                | 1.26             | -                 | 1.26                                 |
| R(O-Mg)/Å               | 2.30<br>2.86     | -                 | 2.31<br>2.92                         |
| R(O <sub>s</sub> -Mg)/Å | 2.13<br>2.14     | 2.13<br>2.13      | 2.14<br>2.14                         |

Table S2 The optimized bond distance and bader charge along the reaction pathway of the first C-H bond breaking on the Stepped MgO(100).

|                         | Pathway I         |              |                        | Pathway II                           |                           |                                           |
|-------------------------|-------------------|--------------|------------------------|--------------------------------------|---------------------------|-------------------------------------------|
|                         | CH <sub>4</sub> * | TS           | H* + CH <sub>3</sub> * | CH <sub>4</sub> * + O <sub>2</sub> * | TS                        | O <sub>2</sub> * + H* + CH <sub>3</sub> * |
| R(C-H)/Å                | 1.10              | 1.40         |                        | 1.10                                 | 1.39                      |                                           |
| R(O <sub>s</sub> -H)/Å  | 2.50              | 1.28         | 0.99                   | 2.30                                 | 1.21                      | 0.98                                      |
| R(C-Mg)/Å               | 2.86              | 2.26         | 2.18                   |                                      |                           |                                           |
| R(O-O)/Å                | -                 | -            | -                      | 1.26                                 | 1.31                      | 1.37                                      |
| R(O-Mg)/Å               | -                 | -            | -                      | 2.31<br>2.92                         | 2.13<br>2.32              | 2.03<br>2.23                              |
| R(O <sub>s</sub> -Mg)/Å | 2.13<br>2.13      | 2.58<br>1.98 | 2.78<br>1.95           | 2.14<br>2.14                         | 2.46<br>2.02              | 2.79<br>1.93                              |
| Q(Os)/e                 | -1.67             | -1.65        | -1.65                  | -1.56                                | -1.39                     | -1.63                                     |
| Q(Mg)/e                 | 1.63              | 1.63         | 1.64                   | 1.64(-Os)<br>1.65<br>1.64            | 1.64(-Os)<br>1.66<br>1.64 | 1.65(-Os)<br>1.64<br>1.64                 |
| Q(O)/e                  |                   |              |                        | -0.16<br>-0.08                       | -0.28<br>-0.31            | -0.48<br>-0.41                            |
| Q(H)/e                  | 0.06              | 0.38         | 0.75                   | 0.03                                 | 0.38                      | 0.76                                      |
| Q(CH <sub>3</sub> )/e   | -0.10             | -0.55        | -0.76                  | -0.05                                | -0.19                     | 0.00                                      |

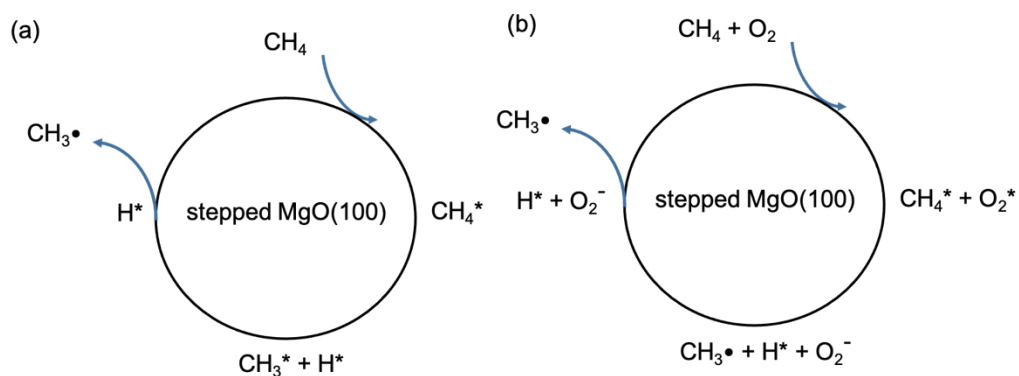

Scheme S1. The schematic illustration OCM reaction mechanism. (a) conventional MvK (b) proposed L-H.
